# Supplementary material
Source: PubMed Central journal article supplement (PMC6482471)
Supplement: NIHMS1013427-supplement-1.pdf [file NIHMS1013427-supplement-1.pdf]

## Supplementary Figure 1

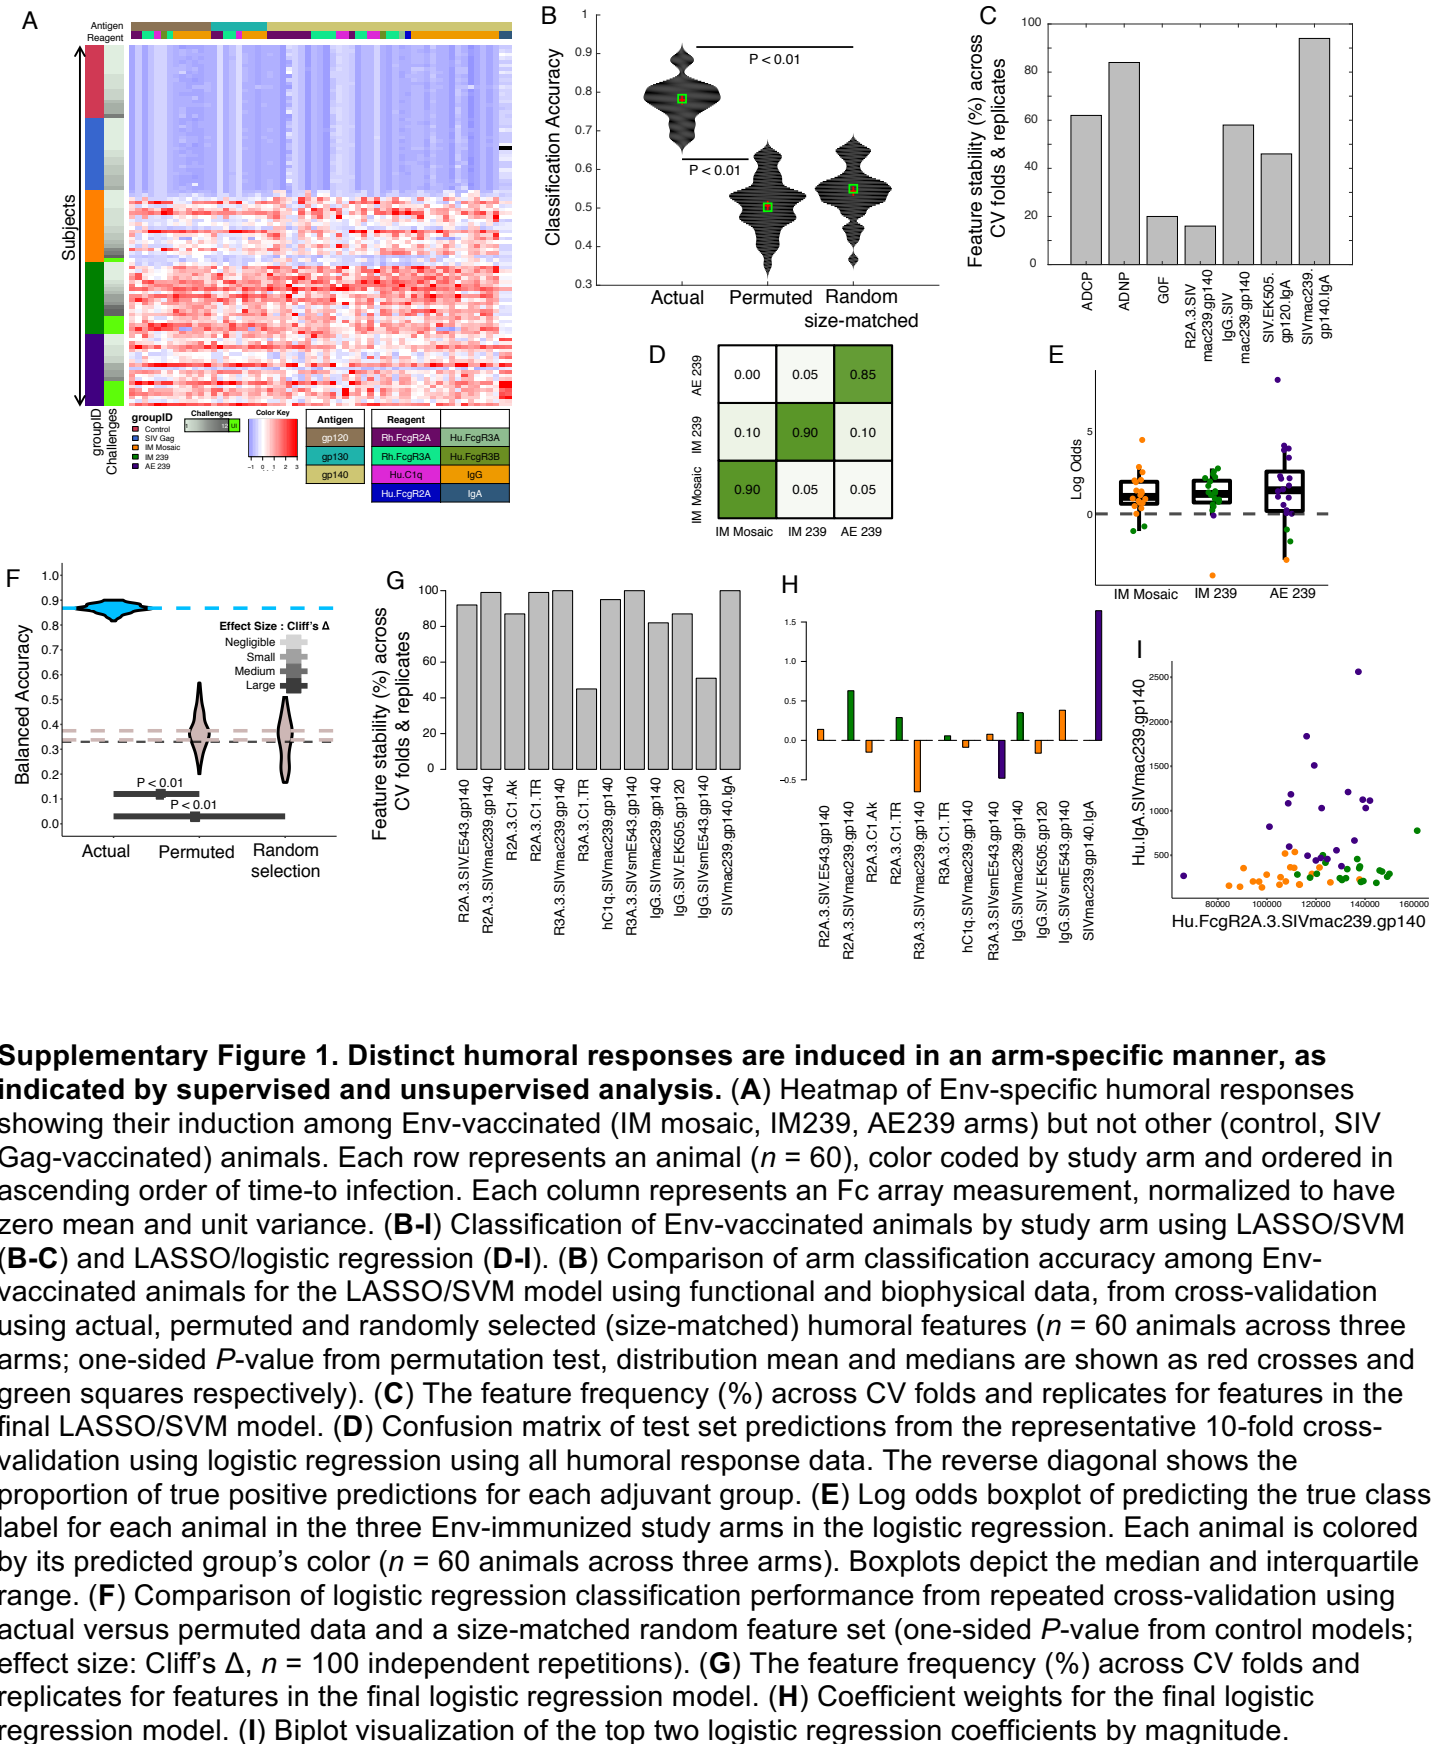

## Supplementary Figure 2

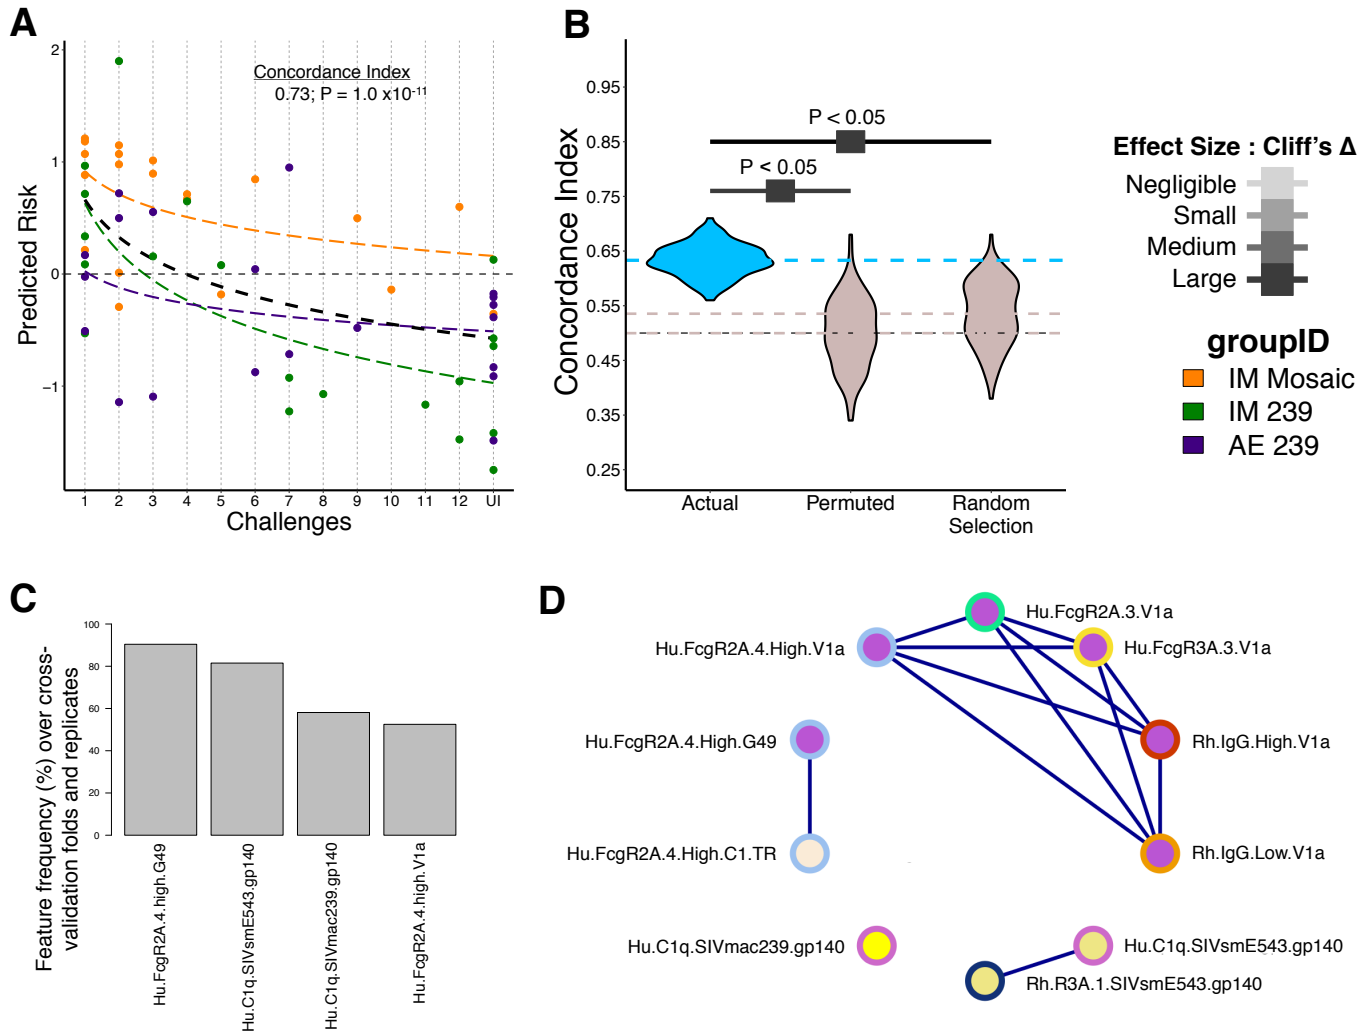

**Supplementary Figure 2. Accuracy, robustness, and feature substitution analysis of protection models learned across Env-immunized animals.** (A) Correlation plot showing the predicted relative risk of infection for each animal in the representative cross-validation test (relative to mean at 0, dashed line) versus the observed per-animal challenge data in CoxPH models. Fit lines approximate relative risk as a log function of time-to-infection. (B) Comparison of Concordance index values from repeated 10-fold cross-validation using actual versus permuted and size-matched random feature selection. ( $P$ -values: probability that control model exceeds actual model performance; effect size: Cliff's  $\Delta$ ;  $n = 100$  independent repetitions). The horizontal dashed lines represent the median Concordance indices and the baseline for random prediction (0.5). (C) The feature frequency (%) across CV folds and replicates for features in the final model. (D) Co-correlates of the features in the final model revealed from substitution analysis. Nodes represent features and edges represent significant correlation ( $P$ -values  $< 0.05$ , Pearson) between them.

### Supplementary Figure 3

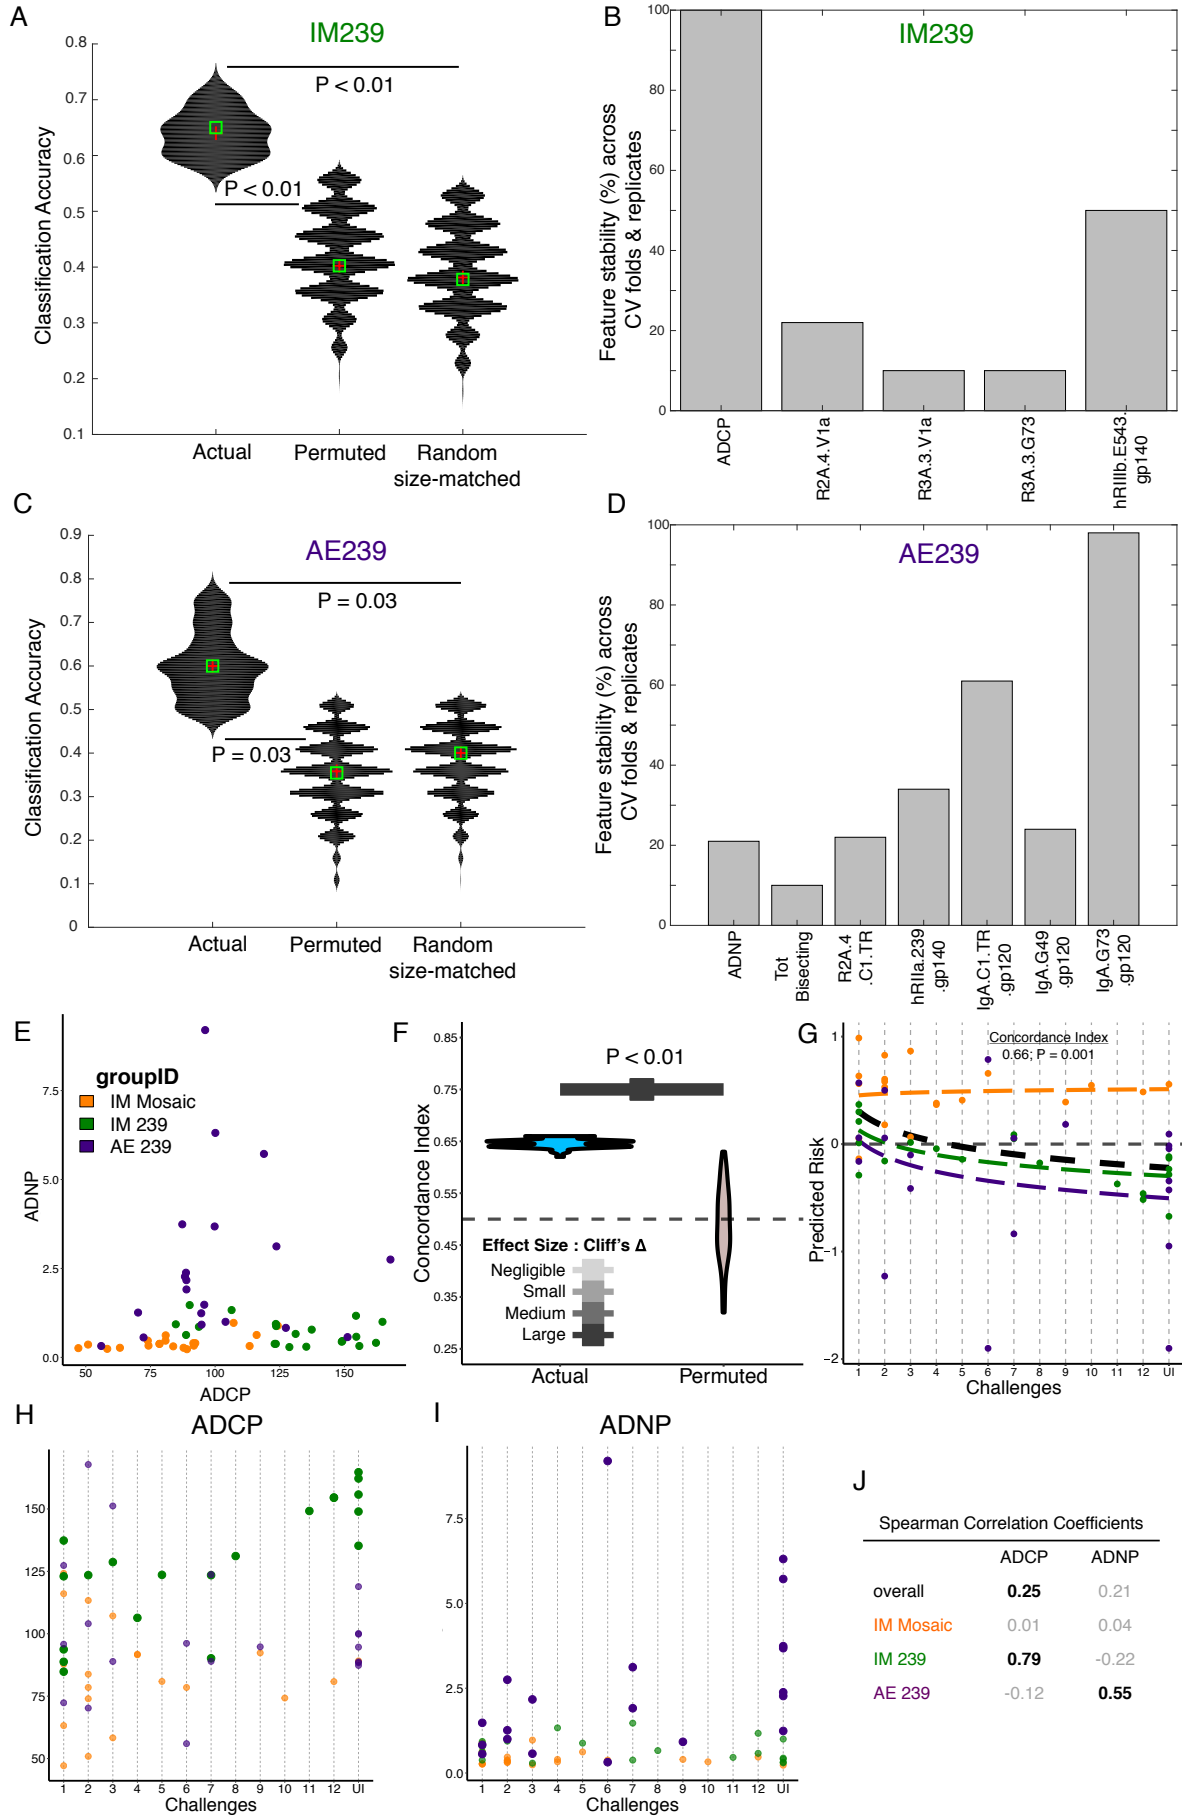

**Supplementary Figure 3. Functional correlates of protection.** (A-D) Accuracy and robustness of challenge outcome classification LASSO models within IM239 and AE239 study arms. (A,C) Comparison of classification accuracy for the classification model for predicting protection status (survived  $\leq 4$  challenges, survived 5-9 challenges or survived  $\geq 10$  challenges) within the IM239 (A) and AE239 (C) study arms, from repeated cross-validation using actual, permuted, and randomly selected (size-matched) features ( $n = 20$  animals in each of the two arms; one-sided  $P$  values from permutation tests, distribution means and medians are shown as red crosses and green squares respectively). (B,D) The feature frequency (%) across CV folds and replicates for features in the final model for IM239 (B) and AE239 (D) study arms. (E) Bi-plot of the two phagocytosis functions. (F-G) Accuracy and robustness of CoxPH model using phagocytosis features. (F) Comparison of C-index values from repeated 10-fold cross-validation using actual versus permuted features. ( $P$ -values: probability that control model exceeds actual model performance; effect size: Cliff's  $\Delta$ ). (G) Correlation plot showing the predicted relative risk of infection for each animal ( $n = 60$ ) in the representative cross-validation test (relative to mean at 0, dashed line) versus the observed per-animal challenge data in CoxPH models. Fit lines approximate relative risk as a log function of time-to-infection. (H-I) Correlative relationships between ADCP (H) and ADNP (I) and challenge outcomes by arm. (J) Table provides arm-wise and overall correlation of these functions with protection (Spearman: two-sided  $P$ -values  $< 0.05$  indicated in bold;  $P = NS$  indicated in gray).

**Supplementary Figure 4**

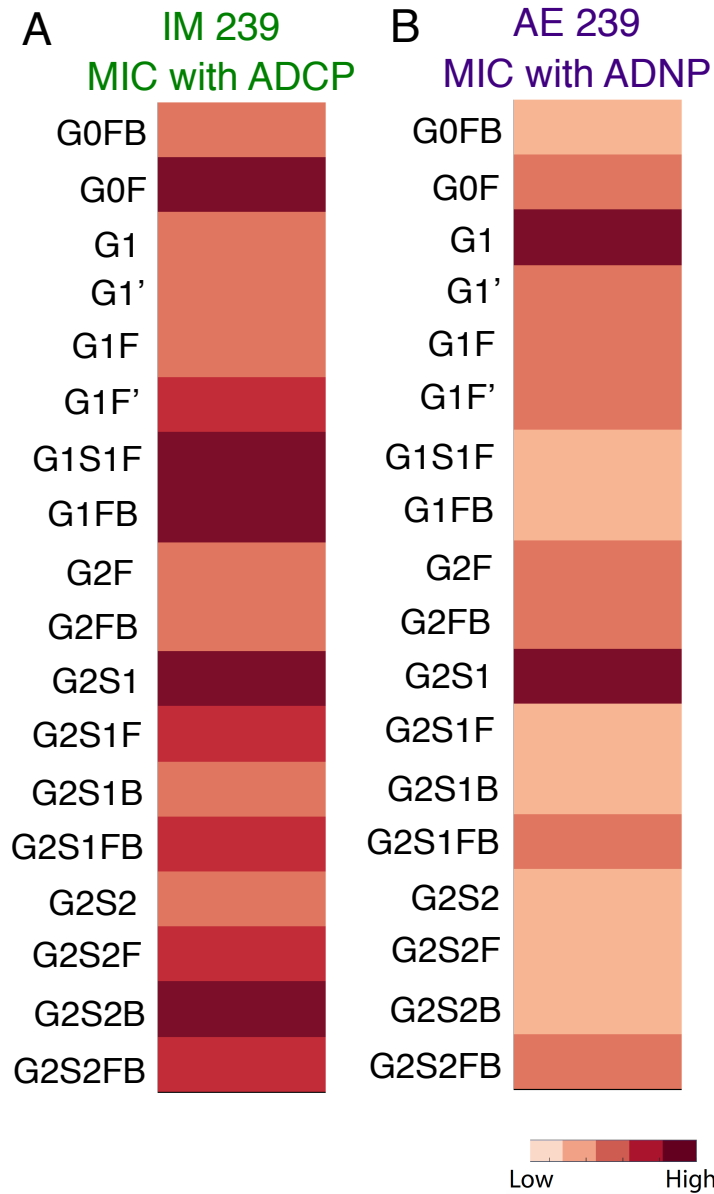

**Supplementary Fig. 4. Non-linear relationships between SIV-specific IgG glycoforms and functional correlates.** (A-B) Maximal information coefficients (MIC) for the IM239 arm between ADCP and individual glycoforms (A), and for the AE239 arm between ADNP and individual glycoforms (B).

## Supplementary Figure 5

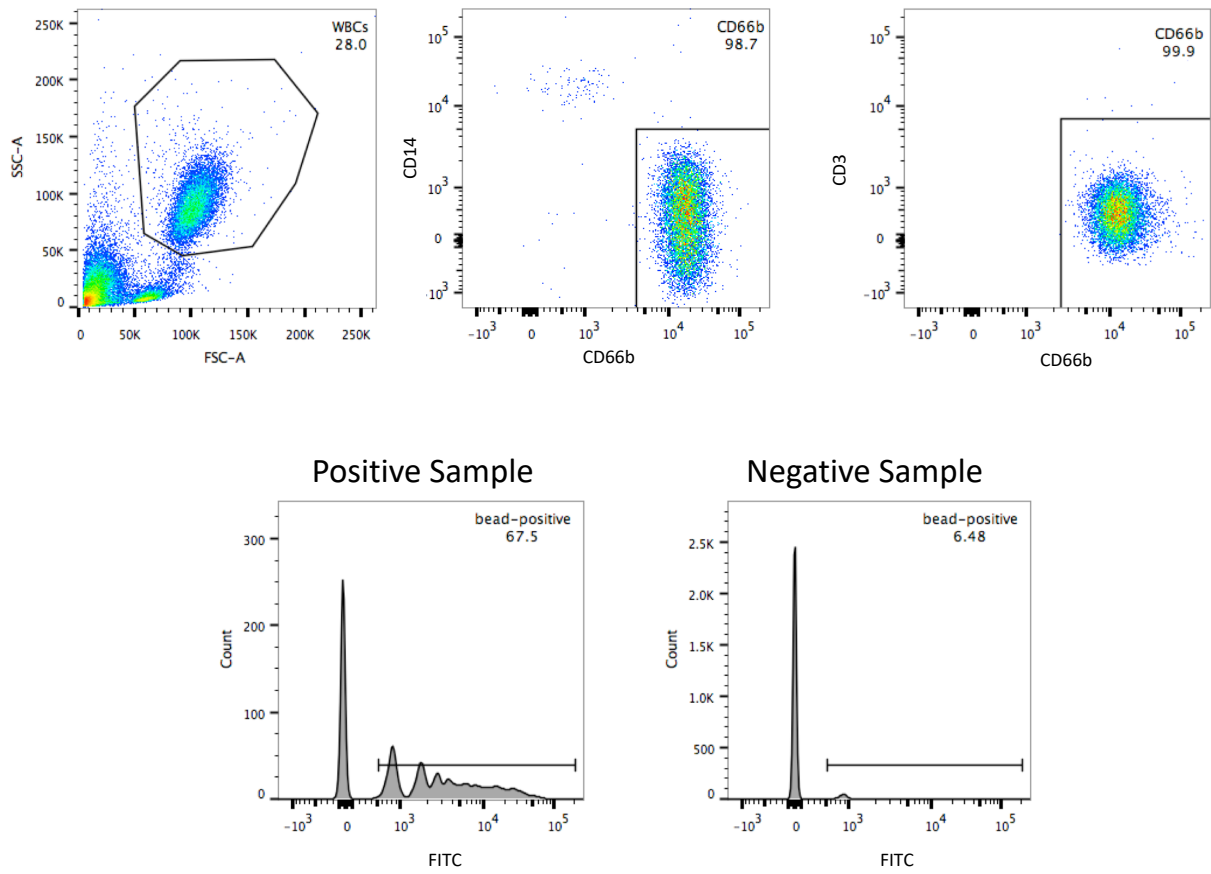

Supplementary Figure 5. Antibody dependent neutrophil phagocytosis gating strategy

**Supplementary Figure 6**

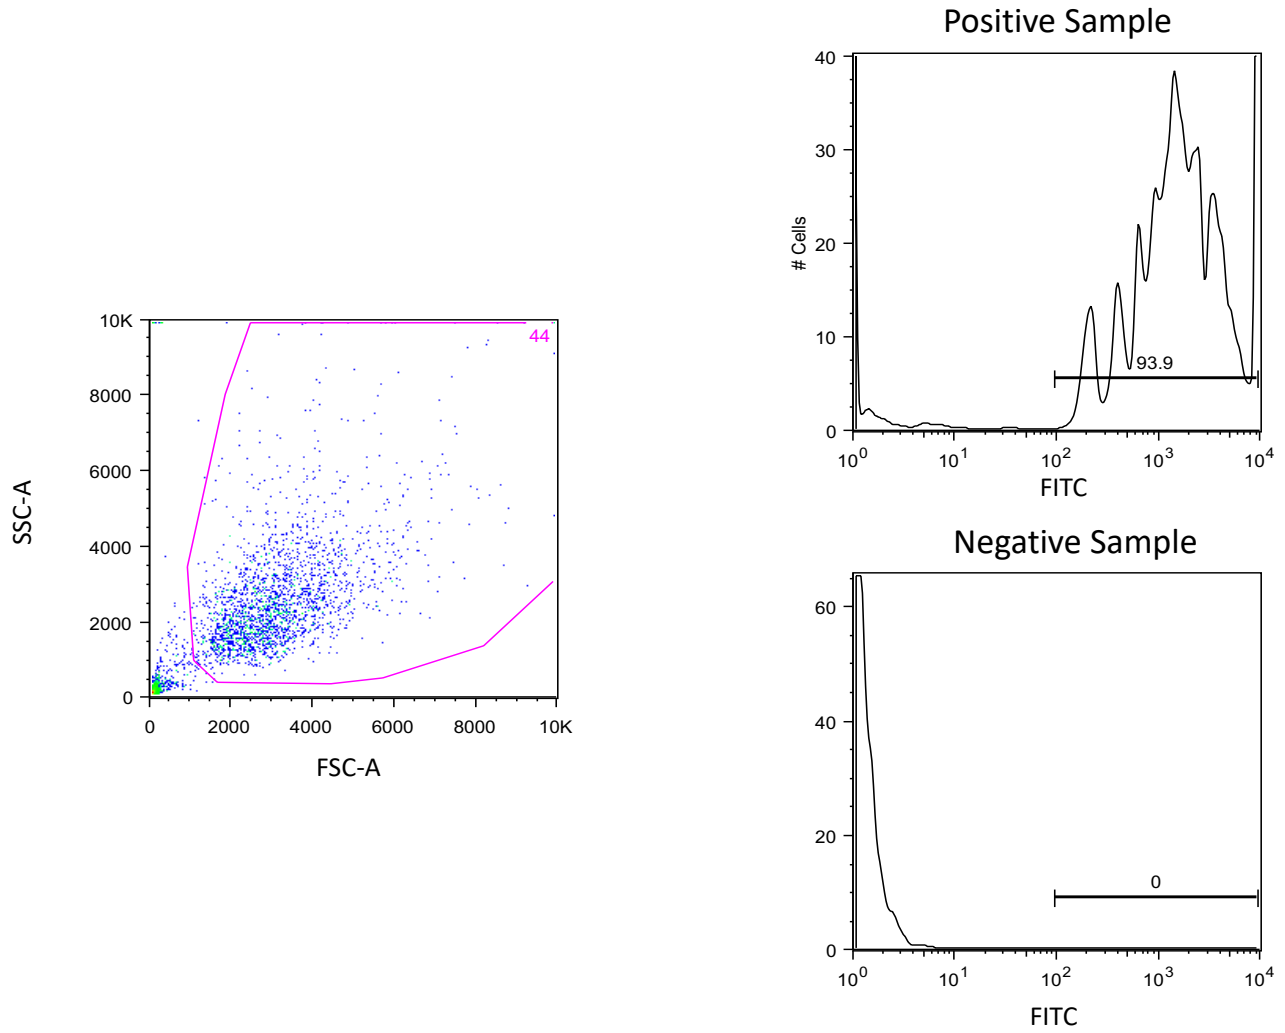

**Supplementary Figure 6. Antibody dependent cellular phagocytosis gating strategy**

**Supplementary Figure 7**

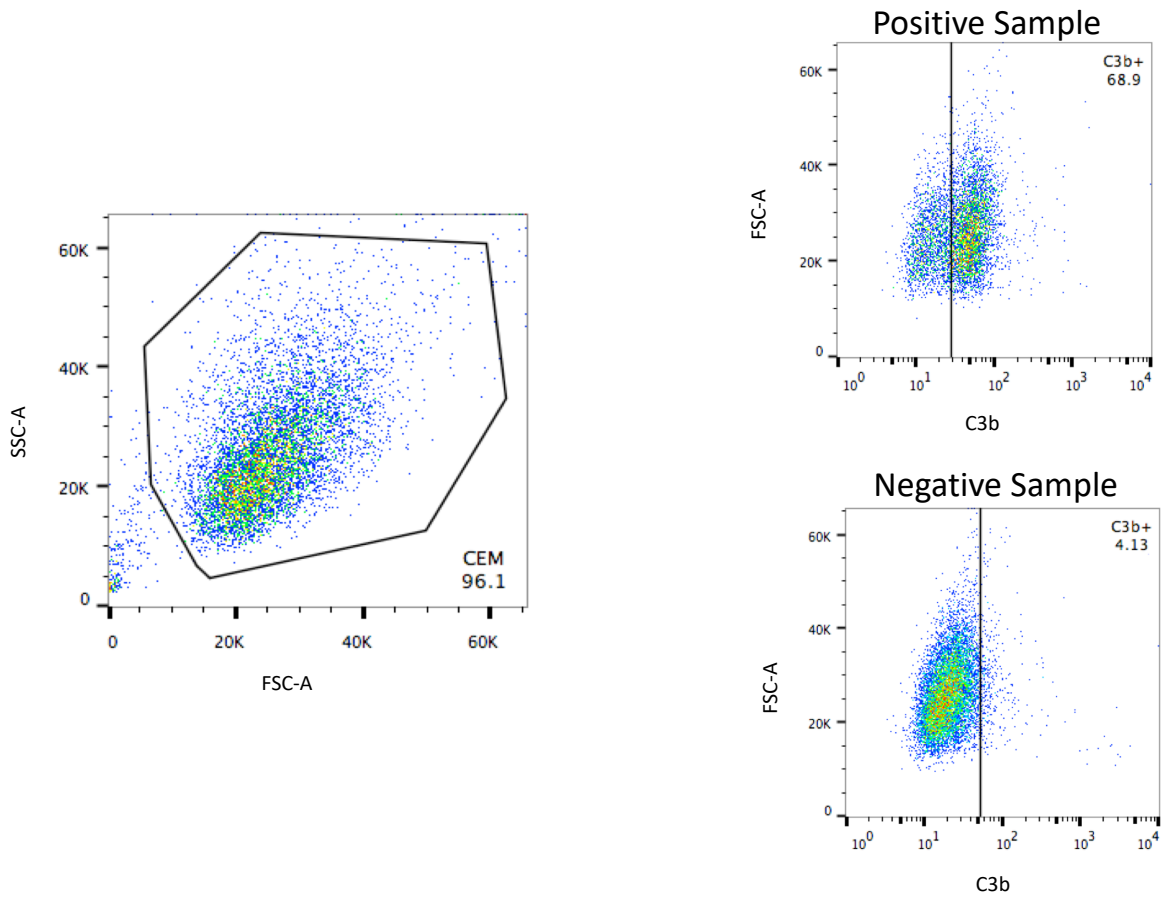

**Supplementary Figure 7. Antibody dependent complement deposition gating strategy**



## Supplementary Figure 8

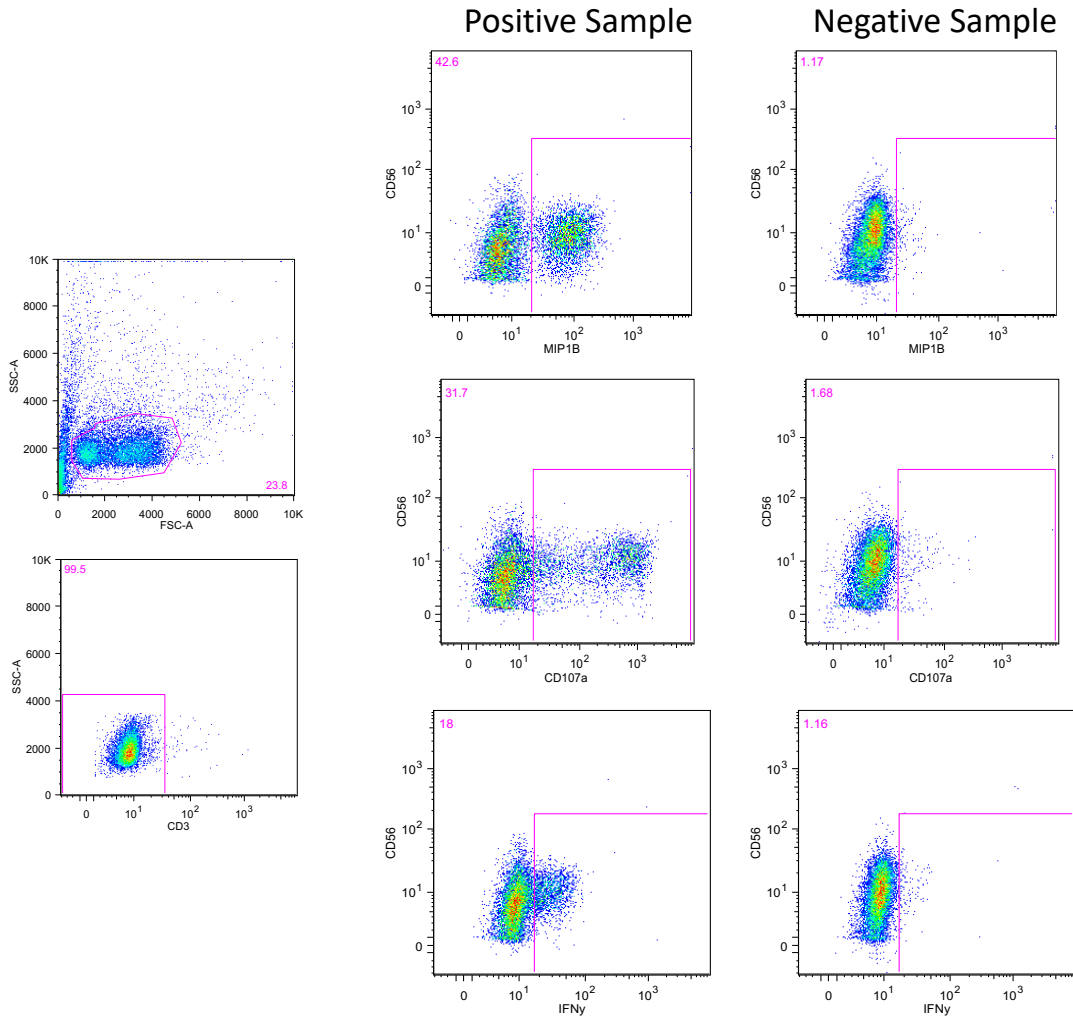

Supplementary Figure 8. Antibody dependent NK cell activation assay gating strategy

## Supplementary Figure 9

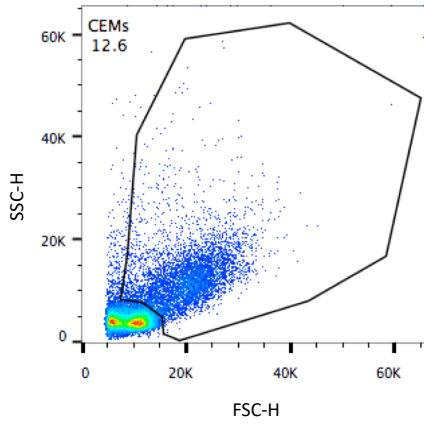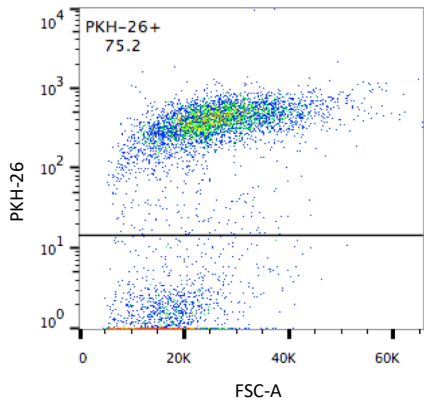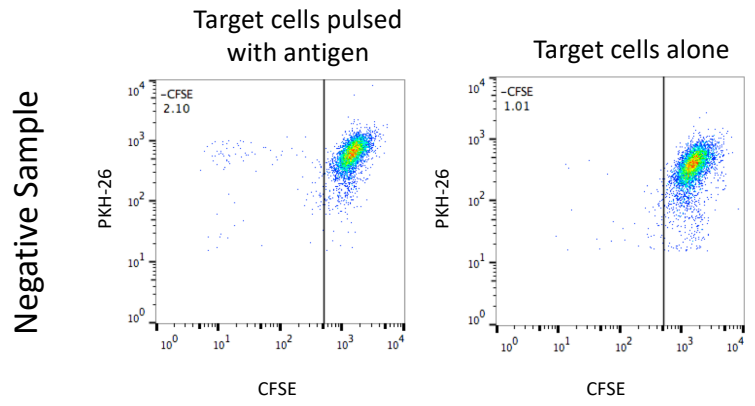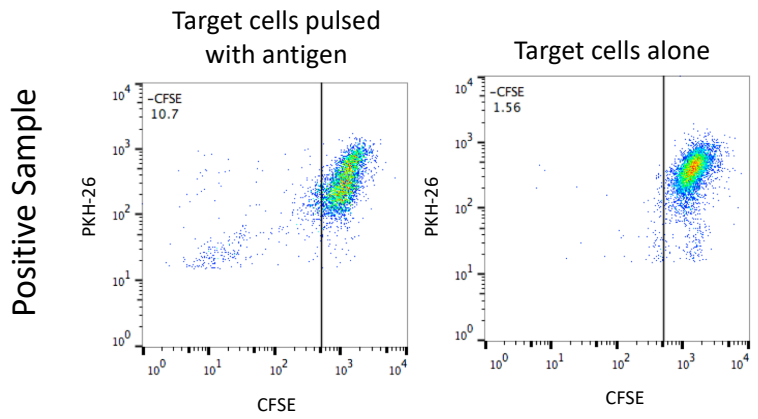

Supplementary Figure 9. Antibody dependent cellular cytotoxicity gating strategy

**Supplementary Table 1.** Challenge outcomes

| Immunogen        | Route     | Infection Rate | Acquisition Efficacy     | Viral Load @ peak (log10) | Viral Load @ Set-point (log10) |
|------------------|-----------|----------------|--------------------------|---------------------------|--------------------------------|
| Control          |           | 34%            |                          | 6.8                       | 4.4                            |
| Mosaic           | IM        | 22%            | 35%<br>(0.12)            | 5.7<br>(p=0.001)          | 3.8<br>(p=0.16)                |
| SIVmac239        | IM        | 11%            | 69%<br>(p=0.0002)        | 6.1<br>(p=0.035)          | 4.0<br>(p=0.40)                |
| <b>SIVmac239</b> | <b>AE</b> | <b>11%</b>     | <b>70%</b><br>(p=0.0002) | <b>6.5</b><br>(p=0.39)    | <b>4.8</b><br>(p=0.35)         |

*Grey font= previously reported data*

*Black font= newly added data*

Previously reported data from: Roederer, M., *et al.* Immunological and virological mechanisms of vaccine-mediated protection against SIV and HIV. *Nature* 505, 502-508 (2014).

**Supplementary Table 2.** Humoral response characteristics evaluated.

| SIV Antigens                                                | Detection Reagents             | Functions    | Glycans                                                               |
|-------------------------------------------------------------|--------------------------------|--------------|-----------------------------------------------------------------------|
| gp120 (SIVmac239, SIVcpzEK505, SIVsmE660.2A5, SIVsmE660.84) | Rh.FcgR2A (1,2,3,4)            | ADCP         | G0 (G0F, G0FB)                                                        |
| gp130 (SIVmac239)                                           | Rh.FcgR3A (1,3)                | ADCC         | G1, G1' (G1F, G1'F, G1B, G1S1F)                                       |
| gp140 (SIVmac239 trimer, SIVmac1A11, SIVsmE543)             | IgG [High, Low concentrations] | ADNP         | G2 (G2F, G2B, G2S1, G2S1F, G2S1B, G2S1FB, G2S2, G2S2F, G2S2B, G2S2FB) |
| V1a-<br>GGGGRCNKTTETDRWGLTRNAGT                             | Hu.C1q                         | CD107a       | Fucosylated                                                           |
| G49- (V1b peptide)<br>GGGGENVINESNPCIKNNS                   | Hu.FcgR2A                      | IFN $\gamma$ | Bisected                                                              |
| C1.AK-<br>GGGGAWKNATIPLFCATKNRDTWGT                         | Hu.FcgR3A                      | MIP1 $\beta$ | Di-Sialylated                                                         |
| C1.TR-<br>GGGGAWKNATIPLFCTTRNRDTWGT                         | Hu.FcgR3B                      | ADCD         | Mono-Sialylated                                                       |
| G73- C2 peptide<br>GGGGVIQESCDKHYWDAIR                      | IgA                            |              |                                                                       |
| G119- C3 peptide<br>GGGGAIQEVKETLVKHPRY                     |                                |              |                                                                       |
| J08.V1V2.E660.2A5                                           |                                |              |                                                                       |
| J08.V1V2.E660.84                                            |                                |              |                                                                       |
| J08.V1V2.mac239                                             |                                |              |                                                                       |
